RESEARCH LETTER – Food Microbiology

# Epigallocatechin gallate inhibits the type III secretion system of Gram-negative enteropathogenic bacteria under model conditions

Noboru Nakasone<sup>1,\*</sup>, Naomi Higa<sup>1</sup>, Claudia Toma<sup>1</sup>, Yasunori Ogura<sup>2</sup>, Toshihiko Suzuki<sup>3</sup> and Tetsu Yamashiro<sup>1</sup>

<sup>1</sup>Department of Bacteriology, Graduate School of Medicine, University of the Ryukyus, Nishihara, Okinawa 903-0215, Japan, <sup>2</sup>Department of Food Science and Nutrition, Nara Women's University, Nara 630-8506, Japan and <sup>3</sup>Department of Bacterial Pathogenesis, Infection and Host Response Graduate School of Medical and Dental Sciences, Tokyo Medical and Dental University, Yushima, Bunkyo-ku 1130034, Tokyo, Japan

\*Corresponding author: Department of Bacteriology, Graduate School of Medicine, University of the Ryukyus, Nishihara, Okinawa 903-0215, Japan. Tel: +81-98-895-1124; E-mail: [y4sddbz@yahoo.co.jp](mailto:y4sddbz@yahoo.co.jp)

**One sentence summary:** Epigallocatechin gallate inhibits the type III secretion system (T3SS) of enteropathogenic and enterohemorrhagic *Escherichia coli*, *Salmonella enterica* serovar Typhimurium and *Yersinia pseudotuberculosis*.

Editor: Richard Calendar

## ABSTRACT

Epigallocatechin gallate (EGCG), a major polyphenol in green tea, inhibits the type III secretion system (T3SS) of enteropathogenic and enterohemorrhagic *Escherichia coli* (EPEC and EHEC, respectively), *Salmonella enterica* serovar Typhimurium, and *Yersinia pseudotuberculosis*. The inhibitory effect causes the inhibition of hemolysis, cell invasion, cell adhesion and apoptosis, which are functions of the type III secretion device. In the case of EPEC, EspB accumulates in the cells. RT-PCR showed that the translation of EspB was not blocked. The transcription of *escN*, which supplies energy for the injection of the effector factor into the host cells, was also not inhibited. EGCG does not suppress the transcription and translation of T3SS constitutive protein in bacterial cells, but it seems to suppress the normal construction or secretion of T3SS. When Luria-Bertani (LB) medium was used to visualize the EGCG-induced inhibition of T3SS, the inhibitory effect disappeared. The inhibition of T3SS was partially canceled when the T3SS inhibitory potency of EGCG was examined by adding yeast extract, which is a component of LB medium, to DMEM. These results suggest that EGCG probably inhibits secretion by suppressing some metabolic mechanisms of T3SS.

**Keywords:** Epigallocatechin gallate; Type III secretion system; inhibition

## INTRODUCTION

The type III secretion system (T3SS) is known to play an important role in disease as a virulence factor and is highly conserved in many Gram-negative pathogenic bacteria, including enteropathogenic *Escherichia coli* (EPEC), enterohemorrhagic *E. coli* (EHEC), *Salmonella* spp.,

*Yersinia* spp., *Shigella* spp., *Pseudomonas aeruginosa*, *Citrobacter rodentium* and *Chlamydia* spp. (Cobum, Sekirov and Finlay 2007). EPEC is the major cause of infant diarrhea in developing countries, and builds up the attaching and effacing (AE) lesion for the initial attachment to the intestinal epithelial cells by using T3SS. *Salmonella* requires T3SS-1 for intracellular invasion, and

Received: 1 April 2017; Accepted: 31 May 2017

Published by Oxford University Press on behalf of FEMS 2017. This work is written by (a) US Government employee(s) and is in the public domain in the US.

**Table 1.** Characteristics of pathogenic *E. coli* strains.

|      | No. | Year | Location  | O-type | Gene <sup>a</sup> |            |       |
|------|-----|------|-----------|--------|-------------------|------------|-------|
|      |     |      |           |        | <i>easA</i>       | <i>stx</i> | other |
| EPEC | 1   | 1981 | Kenya     | O119   | +                 | –          | –     |
|      | 2   | 1999 | Laos      | O142   | +                 | –          | –     |
|      | 3   | 2000 | Indonesia | O119   | +                 | –          | –     |
|      | 4   | 2000 | Indonesia | O119   | +                 | –          | –     |
|      | 5   | 2003 | Japan     | O128   | +                 | –          | –     |
|      | 6   | 2003 | Japan     | O26    | +                 | –          | –     |
| EHEC | 7   | 2003 | Japan     | O111   | –                 | +          | –     |
|      | 8   | 2003 | Japan     | O111   | –                 | +          | –     |
|      | 9   | 2003 | Japan     | O26    | –                 | +          | –     |
|      | 10  | 2003 | Japan     | O26    | –                 | +          | –     |
|      | 11  | 2003 | Japan     | O26    | –                 | +          | –     |
|      | 12  | 2003 | Japan     | O26    | –                 | +          | –     |

<sup>a</sup>*easA*, EspA; *stx*, Shiga-like toxin; other: *aggR*, EAEC; *ets* and *elt*, ETEC; *ipaH*, EIEC; Toma et al. 2003).

*Yersinia* induces cell invasion and cell death using T3SS. T3SS-deficient strains exhibit greatly reduced pathogenicity (Abe et al. 1998), so T3SS is regarded as a novel target for anti-infective drugs.

Green tea is a type of tea made from *Camellia sinensis* leaves and has been widely used as a traditional and private medicine for a variety of diseases (Bao and Peng 2016). Epigallocatechin gallate (EGCG) is the most abundant polyphenol in green tea, exhibiting anti-oxidant, anti-inflammatory and anti-radiation biochemical effects in vitro (Nagle, Ferreira and Zhou 2006; Pandey & Rizvi 2009). Here, we investigated whether EGCG can be used as an inhibitor of T3SS.

## MATERIALS AND METHODS

### Bacterial strains and growth conditions

In this study, we used enteropathogenic *Escherichia coli* (EPEC) strain E248/69 (Levine et al. 1978), enterohemorrhagic *E. coli* (EHEC) strain EDL933 (Perna et al. 2001), *Yersinia pseudotuberculosis* virulent strain (Gemski et al. 1980) and *Salmonella enterica* serovar Typhimurium virulent strain (Gulig and Curtiss 1987). In addition, we also used six EPEC and six EHEC strains, all of which were clinically isolated in our laboratory (Table 1; Toma et al. 2003).

EPEC and EHEC were cultured in Dulbecco's Modified Eagle's Medium (DMEM). *Yersinia pseudotuberculosis* was cultured in LB broth containing 25 mM of oxaloacetic acid and 10 mM of MgCl<sub>2</sub>. *Salmonella enterica* serovar Typhimurium was cultured in LB broth containing 0.3 M of NaCl.

### Type III secretion inhibition assay

Bacteria were cultured in medium supplemented with or without EGCG at 37°C for 5 h with shaking. The culture supernatant was then obtained by centrifugation at 18 800 g for 10 min at 4°C. Proteins that had been secreted into the culture supernatant were precipitated using trichloroacetic acid (final concentration, 10%). The proteins were then subjected to SDS-polyacrylamide gel electrophoresis. After protein staining, the presence or absence of the secreted proteins was examined.

### Hemolysis inhibition

A hemolysis inhibition assay was performed as described by Kimura et al. (2011) for EPEC and as described by Håkansson et al.

(1996) for *Yersinia*. Briefly, bacteria were cultured in the medium supplemented with or without EGCG. Sheep erythrocytes were washed with phosphate buffered saline (PBS) and suspended in the same culture medium. Bacterial culture and the erythrocyte suspension (50 µl of each) were mixed in a 96-well round bottomed microtiter plate, and close contact between erythrocytes and bacteria was achieved by centrifugation at 60 g for 10 min. After the plate was incubated at 37°C for 90 min, the plate was centrifuged again. The resulting supernatants were transferred to a new plate, and the OD at 450 nm was measured by using a microplate reader.

### Preparation of bacterial cytosol

Bacteria cultured with the extracts were harvested by centrifugation at 20 000 g for 10 min. The bacterial pellets were suspended in 2% SDS sample buffer and heated at 100°C for 5 min for the detection of EspB using western blotting.

### Cell adherence and invasion assay

HEp-2 cells (2 × 10<sup>5</sup> cells well<sup>-1</sup>) were incubated at 37°C in 5% CO<sub>2</sub> for 18 h. Bacteria (EPEC or EHEC) cultured in DMEM supplemented with or without plant extracts were added to the HEp-2 cells at a multiplicity of infection (MOI) of 50 and incubated at 37°C in 5% CO<sub>2</sub> for 2 h. After washing with PBS, the cells were fixed with methanol and stained with Giemsa. The number of adherent bacteria was counted on approximately 100 HEp-2 cells in 10 randomly selected microscopic fields. HEp-2 cell invasion of *Salmonella* was assayed using a method described by Li et al. (2013).

### Reverse transcription–polymerase chain reaction

To analyse the EspB subtype and the *escN* (cytoplasmic ATPase for protein secretion by T3SS) gene, reverse transcription–polymerase chain reaction (RT-PCR) was performed as previously described (Nakasone et al. 2011). Total RNA extracts were prepared from the bacteria using an RNA isolation kit (Rneasy Mini kit; Qiagen, Valencia, CA, USA). RNA samples were subjected to RT-PCR using a pair of primers and an RT-PCR kit (SuperScript III One-Step RT-PCR System; Invitrogen, Carlsbad, CA, USA). The primer sets for EspB type α (EPEC) (China et al. 1999) were B148 (GCCGTTTTTGAGAGCCA) and B151 (TCCCCAGGACAGATGAGAT), while those for *EscN* (Kyaw et al. 2003) were N1 (CGCCTTTTACAAGATAGAAC) and N2 (CATCAAGAATAGAGCGGAC). RT-PCR was performed according to the following protocol: 94°C for 2 min, followed by 20, 25 or 35 cycles of 94°C for 20 s, 55°C for 40 s, and 72°C for 2 min. The PCR products were analysed using gel electrophoresis in 2% agarose.

### Statistical analysis

All the experiments were performed two or three times in triplicate. Data were expressed as the mean ± standard deviation (SD). Statistical analyses were performed using unpaired two-tailed Student's *t*-tests. Differences were considered significant at a *P* value of < 0.05.

## RESULTS AND DISCUSSION

EPEC was cultured in DMEM containing EGCG at different concentrations of EGCG (4–500 µg ml<sup>-1</sup>). EspB was blocked by about 70% at a concentration of 16 µg ml<sup>-1</sup> EGCG and by about 80% at a

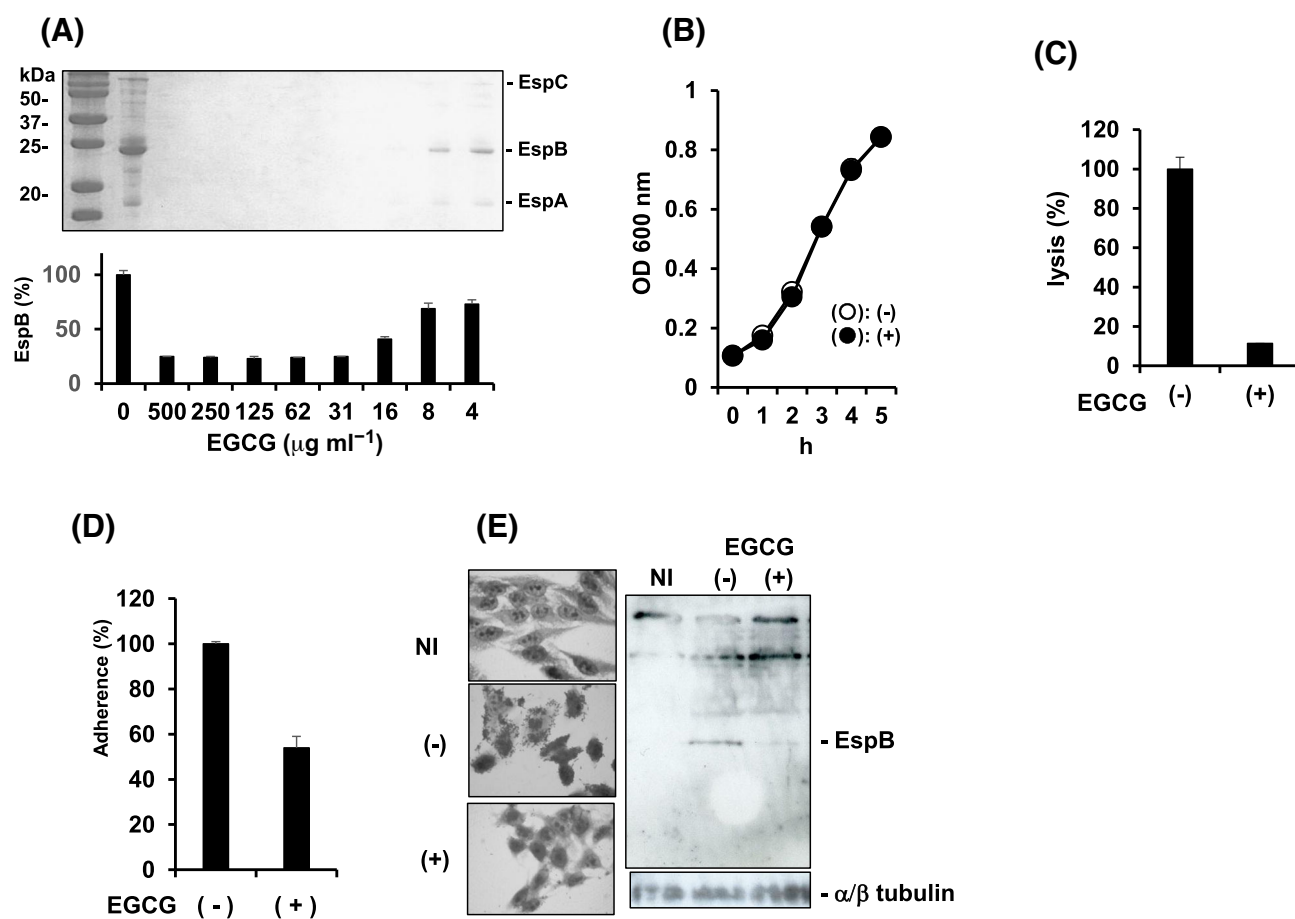

**Figure 1.** Effect of EGCG on EPEC T3SS. (A) Minimum secretion inhibitory concentration of EGCG in EPEC T3SS. EGCG was diluted and added to the medium to obtain the lowest inhibitory concentration of EspB secretion. The degree of secretion was measured using an ELISA at that concentration and was expressed as the relative percentage. (B) Growth curve for EPEC in DMEM supplemented with 50  $\mu\text{g ml}^{-1}$  (filled circles) or without (open circles) EGCG. (C) Relative percentage of hemolytic activity of bacteria cultured in medium supplemented with or without of 50  $\mu\text{g ml}^{-1}$  EGCG. (-), Bacteria cultured in DMEM supplemented without EGCG; (+), bacteria cultured in DMEM supplemented with EGCG. (D) Adhesion of EPEC cultured in medium supplemented with or without EGCG to HEP-2 cells. EPEC was used to infect HEP-2 cells at a multiplicity of infection (MOI) of 50 for 2 h at 37°C in a CO<sub>2</sub> incubator. (E) Detection of EspB using western blotting of HEP-2 cytoplasm. NI, non-infection; (-), bacteria cultured in DMEM supplemented without EGCG; (+), bacteria cultured in DMEM supplemented with EGCG.

concentration of 31  $\mu\text{g ml}^{-1}$  (Fig. 1a). The subsequent secretion inhibition experiments were performed using a concentration of 50  $\mu\text{g ml}^{-1}$ . The growth of EPEC was not inhibited at a concentration of 50  $\mu\text{g ml}^{-1}$  EGCG (Fig. 1b). Sheep blood cell lysis caused by T3SS was inhibited by about 80% (Fig. 1c). EPEC adherence to HEP-2 cells was inhibited by about 65% (Fig. 1d). EspB was not detectable in HEP-2 cytoplasm when HEP-2 cells infected with EPEC were cultured in DMEM supplemented with EGCG (Fig. 1e). The same experiment was performed using EHEC, and similar results were obtained (Fig. 2a–c). Since EHEC has almost the same locus of enterocyte effacement (LEE) gene as EPEC, this result seemed reasonable. We also tested the inhibitory effect of EGCG on the expression of EspB by using six EPEC and six EHEC clinically isolated strains (Table 1), and confirmed that EGCG inhibits the secretion of EspB in all the strains (Fig. 2d).

We investigated whether EGCG inhibits *Salmonella* or *Yersinia* T3SS. *Salmonella* Typhimurium T3SS proteins were inhibited at 12  $\mu\text{g ml}^{-1}$  of EGCG (Fig. 3a). EGCG at 25  $\mu\text{g ml}^{-1}$  blocked *Salmonella* invasion into HEP-2 cells by 80% (Fig. 3b). *Yersinia* T3SS proteins were also inhibited by EGCG at 16  $\mu\text{g ml}^{-1}$  of EGCG (Fig. 3c). The hemolytic activity of *Yersinia* by T3SS was reduced by about 40% at 16  $\mu\text{g ml}^{-1}$  of EGCG (Fig. 3d). When HEP-2 cells were infected with *Yersinia* cultured in media with or without

EGCG, cleaved caspase 3 was not observed in cells infected with *Yersinia* that were cultured in medium containing EGCG (Fig. 3e).

To examine whether EGCG inhibits the transcription of the *espB* and *escN* genes of EPEC, expression of these genes was examined by using RT-PCR. RT-PCR showed that the *espB* subtype  $\alpha$  (98 bp) and *escN* were expressed in the bacteria growing in the medium containing EGCG (Fig. 4a). These results suggest that the EspB protein is produced inside the bacteria. To confirm this hypothesis, we examined the presence of EspB in bacterial cytoplasm using western blotting. Western blotting showed that EspB was present in the cytosol (Fig. 4b). This result suggests that EspB is not secreted extracellularly.

T3SS is known not to be expressed in LB broth unless bicarbonate is added (Abe et al. 2002) or the culturing is performed in the presence of 5% CO<sub>2</sub> (Haigh et al. 1995). These findings suggest that the intracellular metabolic system may be involved in the regulation of expression of T3SS in EPEC and EHEC. EGCG might inhibit T3SS by disturbing the metabolic system of bacteria. To investigate the influence of EGCG on metabolism, EPEC was cultured in LB broth with or without EGCG in a 5% CO<sub>2</sub> incubator. EGCG did not inhibit EspB secretion into the LB medium (Fig. 4c). EPEC T3SS was not blocked even if the amount of EGCG was increased (Fig. 4d). Since LB medium contains tryptone and yeast

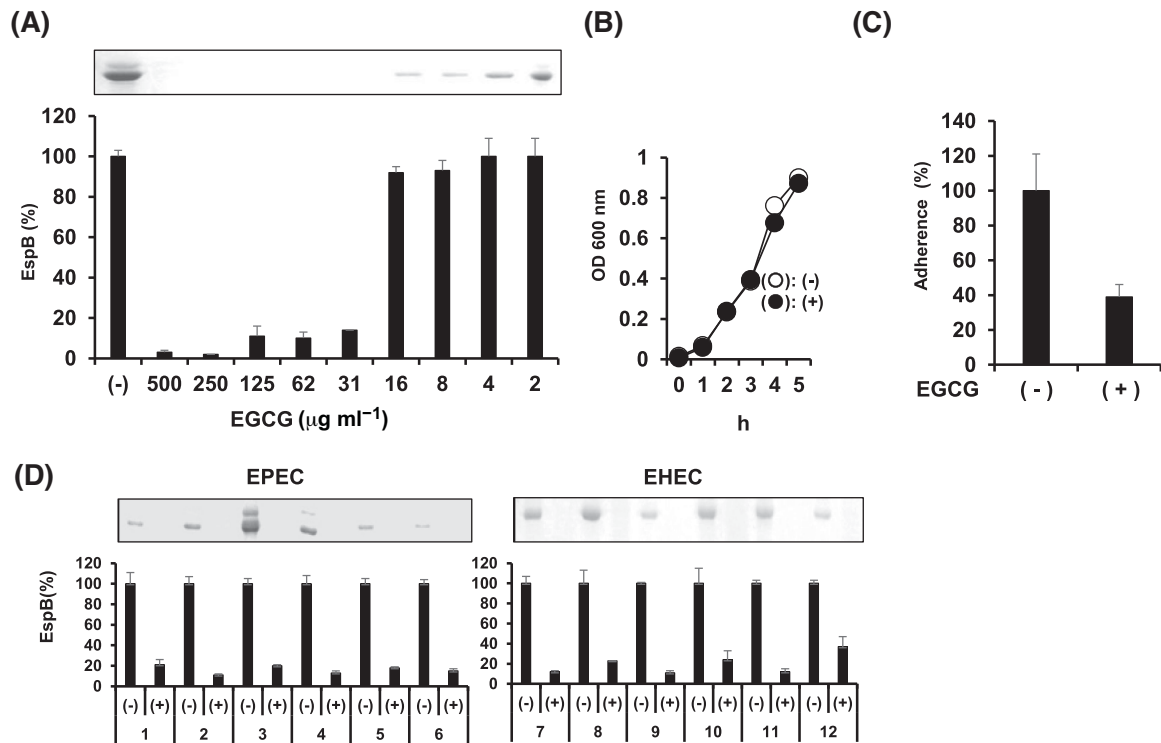

**Figure 2.** Effect of EGCG on EHEC T3SS. (A) Minimum secretion inhibitory concentration of EGCG in EHEC EspB. The procedure was the same as that described in Fig. 1. (B) Growth curve of EHEC in DMEM supplemented with 50  $\mu\text{g ml}^{-1}$  (filled circles) or without (open circles) of EGCG. (C) Adherence of EHEC cultured in medium supplemented with or without EGCG to HEp-2 cells. The procedure was the same as that described in Fig. 1. (-), Bacteria cultured in DMEM supplemented without EGCG; (+), bacteria cultured in DMEM supplemented with EGCG. (D) Effect of EGCG on other *E. coli* strains.

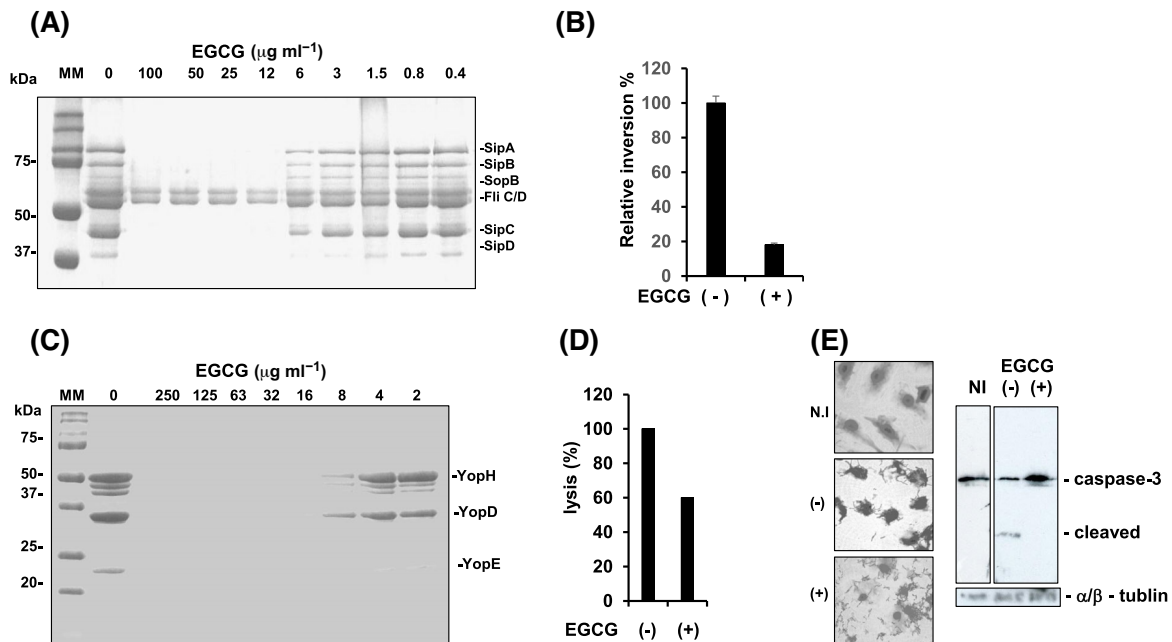

**Figure 3.** Effect of EGCG on *Salmonella* T3SS. (A) Minimum secretion inhibitory concentration of EGCG in *Salmonella* T3SS. The procedure was the same as that described in Fig. 1a. (B) HEp2 cell invasion of *Salmonella* Typhimurium. HEp2 was infected with *Salmonella* Typhimurium at an MOI of 50 for 2 h; extracellular bacteria were killed by gentamicin, and the intracellular bacteria were counted. The number of invaded bacteria was expressed as the relative percentage. (C) Minimum secretion inhibitory concentration of EGCG in *Y. pseudotuberculosis* T3SS. The procedure was the same as that described in Fig. 1a. (D) Relative percentage of hemolytic activity of bacteria cultured in medium supplemented with or without of 50  $\mu\text{g ml}^{-1}$  EGCG. (-), Bacteria cultured in medium supplemented without EGCG; (+), bacteria cultured in medium supplemented with EGCG. (E) Cleavage of caspase 3 induced by macrophage infection of *Y. pseudotuberculosis*. *Yersinia* was infected with mouse bone marrow-derived macrophages at an MOI of 100 for 2 h, and the activity of caspase 3 in the macrophages was examined using western blotting. NI, non-infection; (-), bacteria cultured in medium supplemented without EGCG; (+), bacteria cultured in medium supplemented with EGCG.

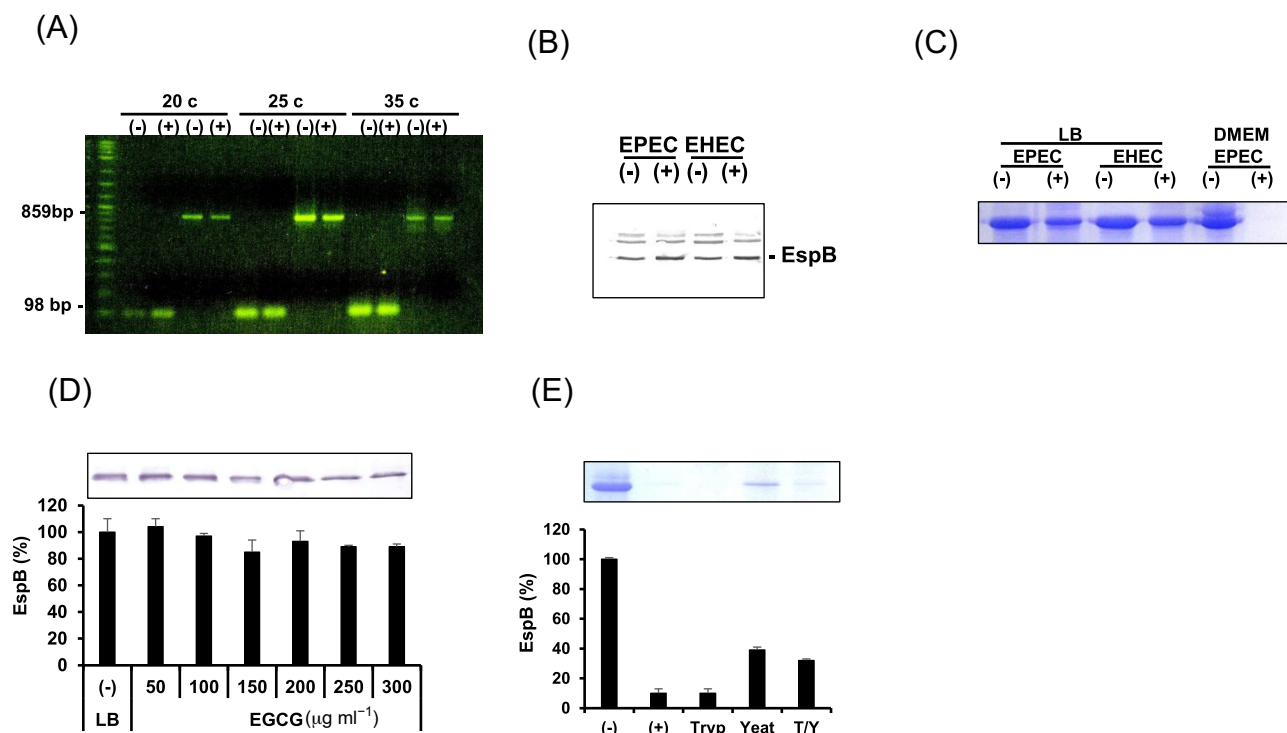

**Figure 4.** Properties of EspB secretion during T3SS inhibition by EGCG. (A) Reverse transcription–polymerase chain reaction (RT-PCR) of EspB and *escN* of EPEC. RT-PCR was performed as described in ‘Materials and methods’. (B) Western blotting of cytoplasmic EspB. EPEC cultured in medium supplemented with or without EGCG was harvested by centrifugation. After washing the cells three times with PBS, the cells were dissolved in 2% SDS solution and heated at 100°C for 5 min. EspB in the bacterial cytoplasm was then examined using western blotting. (C) Effect of LB medium on T3SS inhibitory action by EGCG. EPEC or EHEC was cultured in LB medium with or without EGCG at 37°C for 12 h in a 5% CO<sub>2</sub> incubator. (D) Minimum secretion inhibitory concentration of EGCG in EPEC EspB. (E) Effect of EGCG on T3SS inhibition when tryptone or yeast or both were added to DMEM. Tryptone or yeast was added at concentrations of 1% and 0.5%, respectively.

extract, tryptone or yeast or both were added to DMEM supplemented with EGCG, and EspB secretion was examined. As shown in Fig. 4e, EspB secretion was restored by the addition of yeast extract, although the degree of restoration was not large (about 40%). Thus, it seems unlikely that the yeast extract component in the LB medium inhibits the function of EGCG, since the LB medium is used to express T3SS in *Yersinia* or *Salmonella* and its expression is inhibited by EGCG. Alternatively, the mechanism by which EGCG inhibits T3SS may differ among these bacteria.

EGCG is known to possess various types of biological activities, such as antiproliferative (Jochmann, Baumann and Stangl 2008), antimutagenic (Gupta, Saha and Giri 2002), antioxidant (Forester SC and Lambert 2011), antibacterial (Ben Lagha, Haas and Grenier 2017), antiviral (Butler and Wu 2011), antimetabolic syndrome (Thielecke F and Boschmann 2009) and chemopreventive effects (Gerhauser 2013; Singh, Shankar and Srivastava 2011). Among these functions, various mechanisms have been proposed. For example, EGCG regulates signal transduction pathways (JAK/STAT, MAPK and NF-κB), induces tumor suppressor activities (p53, p21, p16 and Rb), and modulates function of a variety of receptors (laminin receptor and androgen receptor) in eukaryotic cells. EGCG may therefore have an inhibitory effect on the bacterial T3SS in a similar manner. Further investigation will be required to reveal the target molecule of the EGCG on the T3SS machinery.

Our result suggests that EGCG or green tea may be used as a medicine or special beverage to prevent the infection of enteropathogenic bacteria that have the T3SS as a virulent factor, such as EPEC, EHEC, *Yersinia* spp. and *Salmonella* spp. However, as our result also suggest, it will be important for there to be op-

timal conditions in the intestine for EGCG or green tea to inhibit the bacterial T3SS.

## REFERENCES

- Abe A, Heczko U, Hegele RG *et al.* Two enteropathogenic *Escherichia coli* type III secreted proteins, EspA and EspB, are virulence factors. *J Exp Med* 1998;188:1907–16.
- Abe H, Tatsuno I, Tobe T *et al.* Bicarbonate ion stimulates the expression of locus of enterocyte effacement-encoded genes in enterohemorrhagic *Escherichia coli* O157:H7. *Infect Immun* 2002;70:3500–9.
- Bao H, Peng A. The green tea polyphenol(-)-epigallocatechin-3-gallate and its beneficial roles in chronic kidney disease. *J Transl Int Med* 2016;4:99–103.
- Ben Lagha A, Haas B, Grenier D. Tea polyphenols inhibit the growth and virulence properties of *Fusobacterium nucleatum*. *Sci Rep* 2017;7:44815.
- Butler LM, Wu AH. Green and black tea in relation to gynecologic cancers. *Mol Nutr Food Res* 2011;55:931–40.
- China B, Goffaux F, Pirson V *et al.* Comparison of *eae*, *tir*, *espA* and *espB* genes of bovine and human attaching and effacing *Escherichia coli* by multiplex polymerase chain reaction. *FEMS Microbiol Lett* 1999;178:177–82.
- Cobum B, Sekirov I, Finlay BB. Type III secretion systems and disease. *Clin Microbiol Rev* 2007;20:535–49.
- Forester SC, Lambert JD. The role of antioxidant versus pro-oxidant effects of green tea polyphenols in cancer prevention. *Mol Nutr Food Res* 2011;55:844–54.

- Gemski P, Lazere JR, Casey T et al. Presence of a virulence-associated plasmid in *Yersinia pseudotuberculosis*. *Infect Immun* 1980;**28**:1044–7.
- Gerhauser C. Cancer chemoprevention and nutriepigenetics: state of the art and future challenges. *Top Curr Chem* 2013;**329**:73–132.
- Gulig PA, Curtiss R, 3rd. Plasmid-associated virulence of *Salmonella typhimurium*. *Infect Immun* 1987;**55**:2891–901.
- Gupta S, Saha B, Giri AK. Comparative antimutagenic and anticlastogenic effects of green tea and black tea: a review. *Mutat Res* 2002;**512**:37–65.
- Haigh R, Baldwin T, Knutton S et al. Carbon dioxide regulated secretion of the EaeB protein of enteropathogenic *Escherichia coli*. *FEMS Microbiol Lett* 1995;**129**:63–67.
- Håkansson S, Schesser K, Persson C et al. The YopB protein of *Yersinia pseudotuberculosis* is essential for the translocation of Yop effector proteins across the target cell plasma membrane and displays a contact-dependent membrane disrupting activity. *EMBO J* 1996;**15**:5812–23.
- Jochmann N, Baumann G, Stangl V. Green tea and cardiovascular disease: from molecular targets towards human health. *Curr Opin Clin Nutr Metab Care* 2008;**11**:758–65.
- Kimura K, Iwatsuki M, Nagai T et al. A small-molecule inhibitor of the bacterial type III secretion system protects against *in vivo* infection with *Citrobacter rodentium*. *J Antibiot* 2011;**64**:197–203.
- Kyaw CM, De Araujo CR, Lima MR et al. Evidence for the presence of a type III secretion system in diffusely adhering *Escherichia coli* (DAEC). *Infect Genet Evol* 2003;**3**:111–7.
- Levine MM, Bergguist EJ, Nalin DR et al. *Escherichia coli* strains that cause diarrhea but do not produce heat-labile or heat-stable enterotoxins and are non-invasive. *Lancet* 1978;**1**:1119–22.
- Li J, Lv C, Sun W et al. Cytosporone B, an inhibitor of the type III secretion system of *Salmonella enterica* serovar Typhimurium. *Antimicrob Agents Chemother* 2013;**57**:2191–8.
- Nagle DG, Ferreira D, Zhou YD. Epigallocatechin-3-gallate (EGCG): chemical and biomedical perspectives. *Phytochemistry* 2006;**67**:1849–55.
- Nakasone N, Toma C, Higa N et al. Detergents enhance EspB secretion from *Escherichia coli* strains harboring the locus for the enterocyte effacement (LEE) gene. *FEMS Microbiol Lett* 2011;**315**:109–14.
- Pandey KB, Rizvi SI. Plant polyphenols as dietary antioxidants in human health and disease. *Oxid Med Cell Longev* 2009;**2**:270–8.
- Perna NT, Plunkett G, 3rd, Burland V et al. Genome sequence of enterohaemorrhagic *Escherichia coli* O157:H7. *Nature* 2001;**409**:529–33.
- Singh BN, Shankar S, Srivastava RK. Green tea catechin, epigallocatechin-3-gallate (EGCG): mechanisms, perspectives and clinical applications. *Biochem Pharmacol* 2011;**82**:1807–21.
- Thielecke F, Boschmann M. The potential role of green tea catechins in the prevention of the metabolic syndrome – a review. *Phytochemistry* 2009;**70**:11–24.
- Toma C, Lu Y, Higa N et al. Multiplex PCR assay for identification of human diarrheagenic *Escherichia coli*. *J Clin Microbiol* 2003;**41**:2669–71.
